# Machine learning models for predicting severe COVID-19 outcomes in hospitals

Philipp Wendland<sup>1</sup>, Vanessa Schmitt<sup>1</sup>, Jörg Zimmermann<sup>1</sup>, Lukas Häger<sup>2</sup>, Siri Göpel<sup>2</sup>, Christof Schenkel-Häger<sup>3</sup> and Maik Kschischo<sup>1</sup>

## Affiliations:

<sup>1</sup>University of Applied Sciences Koblenz, Department of Mathematics and Technology, Remagen, DE

<sup>2</sup>University Clinic Tübingen, Department of Internal Medicine 1, Tübingen, DE

<sup>3</sup>University of Applied Sciences Koblenz, Department of Economics and Social Care, Remagen, DE

## Corresponding author:

Maik Kschischo: University of Applied Sciences Koblenz, Department of Mathematics and Technology, Remagen, DE

E-mail address: [kschischo@rheinahr-campus.de](mailto:kschischo@rheinahr-campus.de)

## Abstract

The aim of this observational retrospective study is to improve early risk stratification of hospitalized Covid-19 patients by predicting in-hospital mortality, transfer to intensive care unit (ICU) and mechanical ventilation from electronic health record data of the first 24 hours after admission. Our machine learning model predicts in-hospital mortality (AUC=0.918), transfer to ICU (AUC=0.821) and the need for mechanical ventilation (AUC=0.654) from a few laboratory data of the first 24 hours after admission. Models based on dichotomous features indicating whether a laboratory value exceeds or falls below a threshold perform nearly as good as models based on numerical features. We devise completely data-driven and interpretable machine-learning models for the prediction of in-hospital mortality, transfer to ICU and mechanical ventilation for hospitalized Covid-19 patients within 24 hours after admission. Numerical values of CRP and blood sugar and dichotomous indicators for increased partial thromboplastin time (PTT) and glutamic oxaloacetic transaminase (GOT) are amongst the best predictors.

## Keywords (maximal 6)

NOTE: This preprint reports new research that has not been certified by peer review and should not be used to guide clinical practice.

34 Covid-19, Machine Learning, Prediction, Disease Progression, Laboratory values,  
35 Precision medicine

36

## 37 **1. Introduction**

38 Beginning in late 2019 and lasting until now SARS-CoV-2 manifested as Covid-19 spread  
39 all over the world and caused a worldwide pandemic. Infected patients develop a variety of  
40 disease symptoms and differences in the hemogram resulting in a wide range of disease  
41 severity from mild symptoms not requiring any medical intervention to mechanical  
42 ventilation or a transfer to intensive care unit (ICU) or even death [1–3]]. Several drugs for  
43 Covid-19 treatment have been developed since the beginning of the pandemic and most of  
44 them are linked to different disease stages. For example, hospitalized patients with severe  
45 symptoms can be treated with Remdesivir and Dexamethason, whereas antibody-based  
46 therapy had to be administered at an early disease stage before a patient has developed  
47 severe symptoms [4,5].

48 For optimal patient care and treatment in hospitals it is very important to detect patients  
49 with bad prospective disease progression early and to devise reliable prediction models  
50 which can easily be applied in daily clinical practice. Such an early stratification of patients  
51 can already be used for a decision whether ambulant treatment is sufficient or whether  
52 hospital admittance is advisable. More elaborate and costly diagnosis can be targeted at  
53 high risk patients, e.g. a computertomography of the thorax instead of conventional X-ray  
54 or a more comprehensive blood count. High risk patients can be more intensively  
55 monitored, e.g. by more frequent laboratory tests, oxygen saturation measurements and  
56 blood gas analysis leading to an earlier detection of a worsening of the disease state, so  
57 that a medical intervention can be initiated by physicians. In summary, the early  
58 identification of high risk patients can both improve patient outcome and alleviate the

59 overwhelming pressure on hospitals experienced during the last and possible future  
60 pandemics.

61 Many existing predictive models of severe Covid-19 disease progression are based on  
62 data from tertiary care hospitals like university hospitals or from clinical study data  
63 repositories. Many scoring models incorporate non-standard laboratory values or are only  
64 based on diagnoses, which renders their widespread application in daily clinical practice  
65 difficult [6–8]. Here we present personalized and completely data-driven machine-learning  
66 models for the prediction of (i) in-hospital mortality, (ii) transfer to ICU and (iii) mechanical  
67 ventilation of hospitalized Covid-19 patients. Our models use standard clinical laboratory  
68 data from hospitals of medium level of care measured during clinical routine in  
69 combination with biological sex and age as covariates. Our purely data-driven approach  
70 avoids potential bias or the pure reproduction of well-known results [9] and is an important  
71 addition to the landscape of expert knowledge-based Covid-19 risk scores [10–13]. In  
72 contrast to previous approaches [14], we explored a large space of potential predictors.  
73 We also present simplified models using only dichotomous predictors indicating whether a  
74 laboratory value is below or above reference threshold. These might better reflect the daily  
75 clinical practice than a complex combination of numerical features. In addition, we report a  
76 comprehensive analysis of laboratory values associated with a severe Covid-19 disease  
77 progression.

78

## 79 **2. Methods and patients**

### 80 *2.1 Study population and inclusion criteria*

81 For model development we conducted an observational retrospective cohort study using  
82 electronic health record data from a hospital of medium level of care located in the federal  
83 state of Rhineland-Palatinate in the west of Germany initially collected for billing purposes

84 (Table 1, Figure 1). We included 520 patients with a positive RT-PCR for SARS-CoV-2  
85 identified by the ICD code U07.1 admitted from March 2020 until December 2021 to the  
86 hospital. Because of too many missing values, 12 patients were excluded. The missing  
87 rate for each feature can be found in the Github repository  
88 [https://github.com/philippwendland/ML\\_Covid19](https://github.com/philippwendland/ML_Covid19). No patient was transferred from an ICU  
89 of another hospital. Extreme data points were manually checked for outliers via visual  
90 checks using violinplots. No data were removed, because the close inspection revealed  
91 that these extreme values are actual measurements.  
92 For model development and prior to any preprocessing steps we performed a random  
93 train-test split using 80% of the data as training set and 20% as test set. The report is  
94 based on the STROBE-statement, the IJMEDI checklist for assesment of medical AI and  
95 the MINIMAR statement [15–17]. Ethical approval was obtained from the local ethics  
96 commission of the University of Applied Sciences Koblenz in their 24<sup>th</sup> meeting.

97

## 98 *2.2 Study design and statistical analysis*

99 We defined three Covid-19 associated endpoints (see Supplemental Material for details):

- 100 1. Death during hospital stay, short “in-hospital mortality”
- 101 2. Admission to intensive care unit (ICU), short “transfer to the ICU”
- 102 3. Necessity for mechanical ventilation (all OPS beginning with “8-71”), short  
103 “mechanical ventilation”

104 For the training of the prediction models we used laboratory values (see Supplemental  
105 Material for a complete list) obtained during the first 48 hours after admission and  
106 averaged them over this time period. For prediction and model testing, we restricted the  
107 time span to 24 hours after admission. For each endpoint we divided the patient cohort  
108 into two distinct groups, depending on whether the endpoint occurred or not. To check for

109 differences in the laboratory values between these groups we performed Wilcoxon-rank-  
110 sum tests with Bonferroni-Holm adjusted p-values. The p-values were used as a measure  
111 of association strength between the laboratory value and the endpoint and enabled us to  
112 rank the features. We filtered the top-10 laboratory values with an adjusted p-value smaller  
113 than 5% and less than 10% missing values. These were combined with biological sex and  
114 age to form potential features for the machine-learning models. The laboratory values  
115 used as covariates were measured by a Cobas 6000 device from Roche Diagnostics, with  
116 the exception of PTT, which was measured by a Sysmex CS 2500i from Siemens  
117 Healthineers. Xserve was used as laboratory software.

118 We compared three supervised classifiers: Logistic regression (LR), Random forest (RF)  
119 and XGBoost. To select predictive features for each of these three model classes we  
120 employed 5-fold cross validation. For LR we performed forward-backward selection. For  
121 the random forest classifier and the XGBoost classifier we used the mean feature  
122 importance as a criterion for feature selection and in addition also trained these tree based  
123 classifiers using the same features as identified for the LR models. Further, for RF and  
124 XGBoost we performed a hyperparameter optimization on the training set (see  
125 Supplemental Material Section 2.7). The model (including selected features) with the  
126 highest receiver operator characteristics area under the curve (ROC-AUC) averaged over  
127 the cross validation folds from the training data set was selected as the final model for the  
128 respective endpoint.

129 During model creation we observed that the cross validation performance using the  
130 features from the first 48 hours is similar to the performance using the same features  
131 observed during the first 24 hours only. Therefore we decided to train  
132 our models on data from the first 48 hours, but for prediction and testing we restrict to  
133 average laboratory values of the first 24 hours. To handle class imbalance during training

134 we tested the Synthetic Minority Oversampling Technique (SMOTE) [18]. SMOTE creates  
135 synthetic patient data of the smaller group in an imbalanced problem resulting in balanced  
136 groups. SMOTE did not improve model performance on the validation dataset and  
137 therefore our final models are not based on SMOTE (see Supplemental Material section  
138 2.8).

139 In addition to these models based on numerical laboratory values, we trained models  
140 using dichotomous features indicating whether a certain laboratory value exceeds or falls  
141 below a predefined reference threshold. In these models, age was also replaced by a  
142 dichotomous feature indicating whether the patient was older or younger than 60 years at  
143 the time of observation. To prevent data leakage we used the thresholds provided by the  
144 manufacturers of the respective laboratory measurement device (see Supplemental  
145 Material table S1). These models are easier to interpret and might support the need for  
146 rapid decision making by physicians in daily clinical practice (see Supplemental Material  
147 for details). We excluded blood sugar from the list of possible dichotomous predictors,  
148 because reference values depend on the time gap to the last meal before the blood draw.  
149 Information about the last meal was not available. By the very nature of dichotomous  
150 variables, these variations have a stronger impact on the status of the feature and might  
151 induce unnecessary bias, which is not present in the numerical models.

152 Calibration is very important, in particular for models applied to clinical decision making  
153 [19]. In essence, calibration is the agreement between the estimated probability and the  
154 observed frequency of events. To assess calibration, we plotted the observed versus the  
155 predicted proportion of events for the respective endpoint (calibration curves) and  
156 computed the Brier score. In the calibration curves, we used five bins each containing the  
157 same number of samples, which was appropriate for our sample size. Further calibration

158 curves with 10 bins and with bins of identical width are provided in the Supplemental  
159 material, section 2.6.

160

### 161 **3. Results**

#### 162 *3.1 Study population*

163 A total of 520 patients (248 (47.7%) female) admitted to the hospital between March 2020  
164 and December 2021 and diagnosed with SARS-CoV-2 are included in our study (see Table  
165 1). From these, 87 patients (16.7%) deceased and 89 patients (17.1%) were transferred to  
166 the ICU during hospital stay. Due to DNR (Do Not Resuscitate)/DNI (Do Not Inturbate) or  
167 palliative treatment just a subgroup of the deceased patients were transferred to the ICU. A  
168 mechanical ventilation was performed on 59 patients (11.3%). The mean age of our cohort  
169 is 60.4 (45.0 – 82.0), which is expected given that age is a well-known risk factor for  
170 severe disease progression [20].

171

#### 172 *3.2 Laboratory values associated with the disease course*

173 For each of the three endpoints we divided the patients into two subgroups, depending on  
174 whether the endpoint occurred or not. To identify laboratory values indicating differences  
175 between the two respective subgroups we used Wilcoxon-rank-sum-tests with Bonferroni-  
176 Holm adjustment. We restricted this to the first 48 hours of the hospital stay and used the  
177 adjusted p-values to rank the laboratory values according to their association with the  
178 respective endpoint, see Fig. 2. All laboratory values with a p-value smaller than 0.05 were  
179 considered to be strongly associated with the endpoint.

180 For the endpoint in-hospital mortality we found 23 laboratory values to be strongly  
181 associated (Fig. 2a). This includes well-known biomarkers for a severe Covid-19  
182 progression, e.g. lymphocytes in % (Lymph) and monocytes in % (Monoc) as

183 hematological biomarkers, CRP in mg/dl, lactatdehydrogenase in mg/dl (LDH) and  
184 procalcitonin in ng/ml (PCT) as inflammatory biomarkers and N-terminal of the  
185 prohormona brain natriuretic peptide in pg/ml (NTpBNp), glutamic oxaloacetic  
186 transaminase in u/l (GOT) as cardiac biomarkers, and calcium in mmol/l as minerals [21].  
187 The laboratory values with the smallest p-values urea in mg/dl and creatinine in mg/dl are  
188 known to have elevated levels at admission to hospitals in non-survivors compared to  
189 survivors of Covid-19 patients [22]. In accordance with our findings, Covid-19 is sometimes  
190 associated with a coagulation dysfunction, which could be indicated through the significant  
191 partial thromboplastin time in seconds (PTT), QUICK test in % and INR values [23]. We  
192 report significantly increased levels of the mean corpuscular volume in fl (MCV) and  
193 decreased levels of the mean corpuscular hemoglobin concentration in g/dl (MCHC) for  
194 Covid-19 patients who died during their hospital stay which are known to be altered in  
195 Covid-19 patients [24].

196

197 For the endpoint transfer to ICU we identified 15 laboratory values (Fig. 2b), nine of them  
198 overlapping with the strongly associated laboratory values for in-hospital mortality,  
199 including blood sugar in mg/dl (Glucose), calcium and CRP. Interestingly, the two  
200 laboratory values urea and creatinine with the smallest p-values for the endpoint in-  
201 hospital mortality are not strongly associated with a transfer to the ICU. We identified  
202 Neutrophil granulocytes in % (Neutro) to be higher for patients referred to the ICU, but not  
203 for patients who died in the hospital. Neutrophil granulocytes were previously reported to  
204 play an important role in Covid-19-associated thrombosis [25,26]. Reduced levels of  
205 Eosinophils in % (Eos) and an increase in segmented neutrophils in % (Seg) are also  
206 strongly associated with a transfer to the ICU, but not with in-hospital mortality. Low



207 ionized Calcium in mmol/l (iCalcium) and calcium are known indicators of a severe Covid-  
208 19 disease progression [27].

209

210 We found 12 laboratory values to be strongly associated with the necessity for  
211 “Mechanical Ventilation” (Fig. 2c). All of them are a subset of the laboratory values strongly  
212 associated to transfer to ICU, which makes sense, because most of the patients, who  
213 received mechanical ventilation were transferred to the ICU – just seven of them were not  
214 transferred to the ICU.

215 Overall, it can be seen that just a fraction of the 85 to 90 tested laboratory values show a  
216 strong association with the endpoints in our population. In agreement with previous reports  
217 we find CRP, blood sugar (Glucose), LDH, and Lymph as markers for the occurrence of  
218 either of the adverse events. However, it is interesting that urea and creatinine are the  
219 laboratory values with the strongest associations to in-hospital mortality, but are not  
220 strongly associated with the other two endpoints.

221

222 *3.3 CRP and blood sugar are good predictors for the Covid-19 associated endpoints in-*  
223 *hospital mortality, transfer to the ICU and mechanical ventilation (Figure 3)*

224 We devised prediction models for the occurrence of the endpoints based on biological sex,  
225 age and the top-10 laboratory values with the strongest associations to the respective  
226 endpoints from Figure 2. We performed 5-fold cross validation on the training data (80%)  
227 to select the models and their respective features with the highest ROC-AUC. In Fig. 3 we  
228 present results (ROC-curves) for predictions of these selected best models on the test  
229 data (20%) not used for training with violinplots of the predictors based on the entire  
230 dataset. In-hospital mortality can be predicted from the combination of the three laboratory  
231 values CRP, urea and blood sugar evaluated at the first 24 hours after admission

232 augmented by age [20] with an AUC of 0.918 (95% CI: 0.857-0.979) using a logistic  
233 regression model (Fig. 3a). Urea as the top laboratory value associated with in-hospital  
234 mortality (Fig. 2a) was chosen as a predictive feature, although it is not strongly associated  
235 with the other endpoints (Figs 2 b,c).

236 A more complex nonlinear XGBoost model based on age and four laboratory values  
237 predicts the transfer to the ICU (Fig. 3b) with an AUC of 0.821 (95% CI: 0.688-0.954).

238 Please note the differences in the age distribution for this endpoint by contrast with the

239 deceased patients in Fig. 3a. Compared to this endpoint, the laboratory values GOT and

240 calcium were chosen in addition to CRP and blood sugar as predictors for a transfer to the

241 ICU, whereas urea was eliminated by the feature selection procedure. Some patients

242 exhibit extreme GOT levels, as indicated by the violin plots.

243 Most patients who were transferred to the ICU also received mechanical ventilation.

244 Nevertheless, prediction of mechanical ventilation is more difficult (Fig. 3c). The best

245 model is a Random Forest based on calcium, CRP and blood sugar with a test AUC of

246 0.654 (95% CI: 0.498-0.81). These laboratory values are also in the set of predictors for a

247 transfer to the ICU. Increased levels of CRP and blood sugar are strongly associated with

248 and important predictors for all three endpoints.

249

250 *3.4 PTT and GOT are good dichotomous predictors for the Covid-19 associated endpoints*

251 *in-hospital mortality, transfer to the ICU and mechanical ventilation (Figure 4)*

252 The combination of numerical laboratory values and age might still not be simple enough

253 to guide medical decision making under stressful conditions in hospitals. Therefore, we

254 devised models based on dichotomous features indicating, whether the value is higher or

255 lower than a predefined critical threshold. In addition, we also used a dichotomous feature

256 for age, indicating whether the patient was younger than 60 years or not.

257 In hospital mortality can be predicted from dichotomous values for urea, PTT, GOT and  
258 age by logistic regression with an AUC of 0.865 (95% CI: 0.787-0.943), see Fig. 4a. This is  
259 only slightly worse than the prediction from numerical features (compare Fig. 3a). Age and  
260 urea are included as predictors in both the numerical and dichotomous model for this  
261 endpoint.

262 Using only dichotomised features, transfer to the ICU can be predicted with an average  
263 AUC of 0.748 (95% CI: 0.614 to 0.883), see Fig. 4b. This is nearly as accurate as the  
264 prediction from numerical features (compare Fig. 3b). The selected logistic regression  
265 model uses the laboratory values calcium, PTT and GOT in combination with biological  
266 sex as predictors (Fig 4b). GOT and calcium are also part of the numerical model.

267 Predicting the necessity of mechanical ventilation using dichotomous features only (Fig.  
268 4c) seems to be not less accurate (AUC of 0.73, 95% CI:0.565-0.896) than predictions  
269 from numerical features (Fig. 3b). For this endpoint, the best performing model is again  
270 XGBoost with calcium, CRP, PTT and GOT as predictors. Calcium and CRP was also  
271 selected in the model with numerical features, whereas blood sugar was replaced by a  
272 combination of PTT and GOT in the model with dichotomous features only. As for the  
273 numerical features, neither age nor biological sex as additional features improved the  
274 prediction (cross validation on the training data) of the need for mechanical ventilation.

275

276 The differences between the features selected for the numerical and dichotomous models  
277 indicate that some laboratory values are more suitable for decisions based on  
278 dichotomized values (“too high / too low”) than others. The reference range of the  
279 laboratory values is defined such that 95% of a healthy reference population have values  
280 lying within the reference range, which does not mean, that laboratory values lying outside  
281 the reference range are automatically critical values [28]. For example, urea and calcium

282 seem to be robust against dichotomization, whereas the absolute level of the CRP seems  
283 to be more informative than just an increase above the reference level. In contrast, a too  
284 high a value of PTT seems to be informative even when the absolute level is not  
285 considered.

286

### 287 *3.5 Calibration and additional performance metrics*

288 To assess model calibration we provide calibration curves of the prediction models (see  
289 Figure 5), which compare the probability of a given class predicted by the model to the  
290 observed fraction. Ideally, these are equal and the calibration curves are diagonal.  
291 Deviations from the diagonal were quantified by the Brier score, which is the mean  
292 squared error relative to the diagonal.

293 These calibration curves were obtained for the test data after training the models.

294 The prediction model for in-hospital mortality based on numerical covariates has a Brier  
295 score of 0.083, but it seems that the model slightly overestimates risks. In contrast, the  
296 prediction model for in-hospital mortality based on dichotomous covariates has a Brier  
297 score of 0.14 and slightly underestimates risks. The model for predicting ICU admission  
298 based on numerical features is well calibrated (Brier score = 0.091), whereas the model  
299 based on dichotomous features slightly underestimates risks. Both models for predicting  
300 mechanical ventilation overestimate the risk, which is possibly caused by the small sample  
301 size. Only 59 patients in our cohort were mechanically ventilated (Figure 1) and the  
302 calibration curves might not be very reliable estimates.

303 Overall, the models for the endpoints in-hospital mortality and ICU admission are  
304 reasonably well calibrated, which can also be seen from the expected calibration error [29]  
305 of the different models (see Tables 2 and 3) and we abstain from recalibrating the models.  
306 For mechanical ventilation, the calibration curves can not be reliably estimated because of

307 the small number of events in the data (see Supplemental material section 2.6 for  
308 calibration curves including 10 bins and bins with identical widths). Whilst the ROC curves  
309 in Figures 3 and 4 provide information about the sensitivity and specificity trade-off of our  
310 prediction models, there are a number of alternative performance metrics which  
311 emphasize other aspects [30,31]. In Tables 2 and 3 we report the negative and positive  
312 predictive values, the F1 score, the accuracy and the balanced accuracy. These precision  
313 metrics depend on the specific threshold chosen for the score (or the estimated class  
314 conditional probability) of the prediction model. In Table 2, we chose a threshold of 50% as  
315 a decision rule for the two classes. In Table 3 we defined the binary decision boundary by  
316 optimizing the F-1 score for the training set. The results in Table 3 indicate, that for an  
317 optimal trade-off between precision and recall we still observe a relatively good balanced  
318 accuracy, despite the class imbalance in our training and test set. Please note, that the  
319 positive and negative predictive value depend on the prevalence of the respective  
320 endpoints and might change in a different cohort. However, for our cohort, the high values  
321 of the negative predictive values indicate that we can safely identify the low risk patients.

## 323 **4. Discussion**

### 324 *4.1 Comparison to other studies*

325 There are several data driven models for the prediction of severe COVID-19 disease  
326 courses with different setting and goals. Here, we compare our results to some of the  
327 previous approaches.

328 Famiglini et al. [32] devised several machine-learning models predicting ICU admission of  
329 COVID-19 patients within the next five days using gender, age and the complete blood  
330 count as potential features. Their best model achieves a ROC-AUC of 0.85 and a Brier  
331 score of 0.144. Our numerical model predicts ICU submission from data of the first 24

332 hours after admission and provides similar accuracy with only a few predictors and is also  
333 well calibrated. Our predictors were selected from a large set of laboratory values in an  
334 unbiased way. In addition, we have models using only dichotomous predictors which are  
335 very easy to interpret.

336 Campbell et al. [33] devised hierarchical ensemble classification models for the prediction  
337 of several severe events connected with Covid-19 based on laboratory and clinical data  
338 available at admission. Due to missing values they removed about 50 percent of the  
339 training data and 85 percent of test data. This might be the reason for the limited  
340 performance of these models on test data.

341 Wu et al. [8] created a logistic regression model for predicting “severe disease” of  
342 hospitalized Covid-19 patients with an extensive external validation on five datasets with a  
343 mean ROC-AUC of 0.88, mean sensitivity of 0.85 and mean specificity of 0.74. Patients  
344 were labeled as “severely diseased” if they die, get a shock, were admitted to the ICU,  
345 develop organic failure or were mechanically ventilated during hospital stay. Their model is  
346 based on demographic features, symptoms, laboratory values and radiological findings.

347 We have developed models based on standard laboratory values, age and biological sex  
348 for more specific endpoints using only data from the first 24 hours after hospital admission.  
349 In addition, we think that the dichotomous models are an useful addition to these studies.

350 Wollenstein-Betech et al. [7] devised machine-learning prediction models for adverse  
351 events of Covid-19 patients using publicly available data of 91.000 patients from Mexico.  
352 Their models were based on demographic features and comorbidities leading to a ROC-  
353 AUC of 0.75 for hospitalization and 0.7 for mortality. Although their work is different in  
354 scope, it is remarkable that simple models like logistic regression and support vector  
355 machines perform just as well as more complex models. They used both positive Covid-19  
356 patients and patients waiting for test results, which might induce label noise. In our data,

357 we could see a clear difference in the distribution of many laboratory values in patients  
358 with a positive PCR test and patients that were only diagnosed with Covid-19 based on the  
359 clinical impression, but did not have a positive test.

360 Heber et al. [14] developed a linear mixed model for the prediction of in-hospital mortality  
361 using patient-specific intercepts and slopes of hematological parameters measured during  
362 the first 4 days after admission. With a ROC-AUC of 0.92 their model achieves similar  
363 performance like ours, but our model is tested on laboratory values of the first 24 hours  
364 after admission. Further, we prevent bias by using a data-driven feature selection, whereas  
365 Heber et al. limit their set to just twelve potential variables before feature selection.

366 Häger et al. [10] report an external validation of the predictive performance for five  
367 important Covid-19 risk scores for in-hospital mortality and ICU admission. The 4c-score  
368 [34] performs best for in-hospital mortality with a ROC-AUC of 0.81 and the easy-to-use  
369 bedside score NEWS [35] performs best for ICU admission with a ROC-AUC of 0.83. Our  
370 data-driven models perform better for in-hospital-mortality and similarly for ICU admission.

371 Son et al. [3] provides a simple and well interpretable four class score for predicting  
372 severity of Covid-19 based on vital parameters, but unfortunately do not test the  
373 performance on patient data.

374 Recent reviews [36,37] describe the landscape of state-of-the-art machine-learning models  
375 applied to Covid-19 patient data. Most papers use quite simple models based on Logistic  
376 Regression, XGBoost and Support Vector machines. As pointed out in [31], a limitation of  
377 many studies is that the data base for these models includes sicker patients, which could  
378 potentially result in selection bias.

379 In comparison to previous work, our models are based on an unbiased set of potential  
380 features and result in simple models. Another new contribution are the models with

381 dichotomous features, which are easy to apply and to interpret, without substantially  
382 impeding the predictive performance.

383

#### 384 *4.2 Summary and Conclusion*

385 All in all, we devise purely data-driven predictive machine-learning models for a severe  
386 Covid-19 outcome using a small and well interpretable number of standard laboratory  
387 values combined with age and biological sex. The endpoints in-hospital mortality and  
388 transfer to the ICU can be predicted with high or good accuracy within the first 24 hours  
389 after admission. Predicting the need for mechanical ventilation is much more difficult. For  
390 all three endpoints, models using only dichotomous features perform only slightly worse  
391 than models based on a complex combination of numerical laboratory values, sometimes  
392 complemented by age and/or biological sex. In particular, the models based on  
393 dichotomous features are simple to interpret and easily applicable in a real life hospital  
394 setting. Further, the simplicity of our models offers a real-time online prediction of the  
395 patient risks with prediction times far less than one second.

396 For some laboratory values including CRP and blood sugar the numerical values are  
397 informative for prediction, whereas other laboratory values like PTT and GOT are suitable  
398 as dichotomous features indicating values which are too high or too low. We observe that  
399 many features including CRP, blood sugar, LDH and Lymph are strongly associated to all  
400 of the three endpoints. Intriguingly, urea and creatinine are the laboratory values most  
401 strongly associated with in-hospital mortality, although they are not significantly associated  
402 with the other two endpoints.

403 A real world application of our models as a risk assessment tool requires to define  
404 thresholds with a reasonable trade off between sensitivity and specificity. Depending on  
405 the real but unknown prevalence of the high risk patient group, the positive and negative



406 predictive value at a given threshold might change, when our tests are applied in a  
407 different hospital or in a different phase of the pandemic. The high intrinsic sensitivity of  
408 our model for detecting patients at risk of death (Figure 3 a) with a moderate specificity  
409 implies that the negative predictive value is still high, enabling us to safely stratify patients  
410 with low risk (compare also Tables 2 and 3). For high risk patients, a close monitoring and  
411 possibly, depending on further diagnostics and possible drug interactions, a treatment with  
412 Remdesivir or Nirmatrelvir/Ritonavir and a prophylactic dose of heparin might be  
413 considered.

414 The features included in the dichotomous models might also be useful on its own. For a  
415 patient who has a risky pattern of these dichotomous features, the laboratory software or  
416 the laboratory technicians can already assign a warning and make doctors aware that this  
417 patient might need closer monitoring. Potentially, this could support the decision making  
418 for antibody or antiviral treatment, in combination with other diagnostic results of the  
419 individual patient.

420 We also analyzed ICD codes for diagnosis as additional features and found significant  
421 differences between the two patient groups for each endpoint (Supplemental Material  
422 Figure S2). However, the inclusion of these diagnostic features did not improve the  
423 models much. This suggests that laboratory values alone are sufficient to predict Covid-19  
424 outcomes in hospitals. In addition, the time of diagnosis is often not available in our data.

425

#### 426 *4.3 Limitations*

427 In our study we include patients admitted to hospitals from the beginning of the pandemic  
428 until the end of 2021. Due to the rapidly changing epidemiological circumstances of the  
429 pandemic we were not able to test the generalizability of our models to a population,  
430 where the Omicron mutation is the dominating virus mutation. From 2020 until December

431 2021 the Wildtype, Alpha, Beta and Delta mutations were the dominating Covid-19  
432 variants in Germany [38,39]. Unfortunately, we have no opportunity to check the patient-  
433 level mutation status of the virus variant, but it is plausible that these might be the  
434 dominating mutations in our dataset.

435 Furthermore, we have no data regarding the vaccination status of the patients, but we  
436 assume that most patients until spring or summer 2021 were not completely vaccinated  
437 against Covid-19, but after summer 2021 the majority of the patients should be completely  
438 vaccinated based on the vaccination rate in Germany [40].

439 The inclusion of vital parameters, pre-existing comorbidities and vaccination status could  
440 improve our models. Unfortunately, due to missing information we are not able to remove  
441 patients with DNR/DNI, which could induce a bias in our prediction models.

442 The cohort of 520 patients is relatively small. The uncertainty of our ROC-AUCs can be  
443 reduced by a larger sample size. Further, our data is imbalanced, because only 50 to 90  
444 patients with poor outcomes were observed for each respective endpoint. Although we  
445 addressed this issue, we can not completely exclude bias induced by this class imbalance.

446

#### 447 *4.4 Outlook*

448 To test how well our predictions generalize to other hospitals, we will evaluate the  
449 performance of the trained models on a test set from a different patient cohort and different  
450 hospitals. This will also include extensions to patient cohorts with other dominating virus  
451 mutations. Further improvements include time dependent predictions allowing for an online  
452 monitoring of patients, taking the patient history into account. We will also check whether  
453 the incorporation of genetic risk factors associated with a severe Covid-19 progression [41]  
454 can improve the predictions even further.

455

456 *4.5 Conflict of Interest*

457 The authors declare no competing interests.

458

459 *4.6 Funding Source*

460 This work was part of the project “Ein Global-Trigger-Tool für COVID-19-bedingte  
461 Schwerstschadenereignisse in Krankenhäusern“ (A global trigger tool for Covid-19-caused  
462 sentinel events in hospitals) funded by the Ministerium für Wissenschaft und Gesundheit  
463 Rheinland-Pfalz, Deutschland (ministry of sciences and health of Rhineland-Palatinate,  
464 Germany).

465

466 *4.7 Ethical Approval Statement*

467 The retrospective observational study was approved by and performed according to the  
468 guidelines of the local ethics committees.

469

470 *4.8 Data Availability Statement*

471 Due to German data protection law we are not allowed to publicly share the patient data  
472 used in this publication.

- [1] Amin MdT, Hasan M, Bhuiya NMMA. Prevalence of Covid-19 Associated Symptoms, Their Onset and Duration, and Variations Among Different Groups of Patients in Bangladesh. *Front Public Health* 2021;9:738352. <https://doi.org/10.3389/fpubh.2021.738352>.
- [2] Palladino M. Complete blood count alterations in COVID-19 patients: A narrative review. *Biochem Med (Online)* 2021;31:403–15. <https://doi.org/10.11613/BM.2021.030501>.
- [3] Son K-B, Lee T, Hwang S. Disease severity classification and COVID-19 outcomes, Republic of Korea. *Bull World Health Organ* 2021;99:62–6. <https://doi.org/10.2471/BLT.20.257758>.
- [4] Han F, Liu Y, Mo M, Chen J, Wang C, Yang Y, et al. Current treatment strategies for COVID-19 (Review). *Mol Med Rep* 2021;24:858. <https://doi.org/10.3892/mmr.2021.12498>.
- [5] Mechineni A, Kassab H, Manickam R. Remdesivir for the treatment of COVID 19: review of the pharmacological properties, safety and clinical effectiveness. *Expert Opinion on Drug Safety* 2021;20:1299–307. <https://doi.org/10.1080/14740338.2021.1962284>.
- [6] Sun C, Hong S, Song M, Li H, Wang Z. Predicting COVID-19 disease progression and patient outcomes based on temporal deep learning. *BMC Med Inform Decis Mak* 2021;21:45. <https://doi.org/10.1186/s12911-020-01359-9>.

- [7] Wollenstein-Betech S, Cassandras CG, Paschalidis ICh. Personalized Predictive Models for Symptomatic COVID-19 Patients Using Basic Preconditions: *Hospitalizations, Mortality, and the Need for an ICU or Ventilator*. Health Informatics; 2020. <https://doi.org/10.1101/2020.05.03.20089813>.
- [8] Wu G, Yang P, Xie Y, Woodruff HC, Rao X, Guiot J, et al. Development of a Clinical Decision Support System for Severity Risk Prediction and Triage of COVID-19 Patients at Hospital Admission: an International Multicenter Study. *Eur Respir J* 2020;2001104. <https://doi.org/10.1183/13993003.01104-2020>.
- [9] Yarritu I, Matute H. Previous knowledge can induce an illusion of causality through actively biasing behavior. *Front Psychol* 2015;6. <https://doi.org/10.3389/fpsyg.2015.00389>.
- [10] Häger L, Wendland P, Biergans S, Lederer S, de Arruda Botelho Herr M, Erhardt C, et al. External Validation of COVID-19 Risk Scores during Three Waves of Pandemic in a German Cohort—A Retrospective Study. *JPM* 2022;12:1775. <https://doi.org/10.3390/jpm12111775>.
- [11] Martin J, Gaudet-Blavignac C, Lovis C, Stirnemann J, Grosgrurin O, Leidi A, et al. Comparison of prognostic scores for inpatients with COVID-19: a retrospective monocentric cohort study. *BMJ Open Res* 2022;9:e001340. <https://doi.org/10.1136/bmjresp-2022-001340>.
- [12] Vicka V, Januskeviciute E, Miskinyte S, Ringaitiene D, Serpytis M, Klimasauskas A, et al. Comparison of mortality risk evaluation tools efficacy in critically ill COVID-19 patients. *BMC Infect Dis* 2021;21:1173. <https://doi.org/10.1186/s12879-021-06866-2>.
- [13] Martín-Rodríguez F, Sanz-García A, Ortega GJ, Delgado-Benito JF, García Villena E, Mazas Pérez-Oleaga C, et al. One-on-one comparison between qCSI and NEWS scores for mortality risk assessment in patients with COVID-19. *Annals of Medicine* 2022;54:646–54. <https://doi.org/10.1080/07853890.2022.2042590>.
- [14] Heber S, Pereyra D, Schrottmaier WC, Kammerer K, Santol J, Rumpf B, et al. A Model Predicting Mortality of Hospitalized Covid-19 Patients Four Days After Admission: Development, Internal and Temporal-External Validation. *Front Cell Infect Microbiol* 2022;11:795026. <https://doi.org/10.3389/fcimb.2021.795026>.
- [15] Vandembroucke JP, von Elm E, Altman DG, Gøtzsche PC, Mulrow CD, Pocock SJ, et al. Strengthening the Reporting of Observational Studies in Epidemiology (STROBE): Explanation and Elaboration. *PLoS Med* 2007;4:e297. <https://doi.org/10.1371/journal.pmed.0040297>.
- [16] Cabitza, Federico, Campagner, Andrea. The IJMEDI checklist for assessment of medical AI 2021. <https://doi.org/10.5281/ZENODO.6451243>.
- [17] Hernandez-Boussard T, Bozkurt S, Ioannidis JPA, Shah NH. MINIMAR (MINimum Information for Medical AI Reporting): Developing reporting standards for artificial intelligence in health care. *Journal of the American Medical Informatics Association* 2020;27:2011–5. <https://doi.org/10.1093/jamia/ocaa088>.
- [18] Chawla NV, Bowyer KW, Hall LO, Kegelmeyer WP. SMOTE: Synthetic Minority Over-sampling Technique. *Jair* 2002;16:321–57. <https://doi.org/10.1613/jair.953>.
- [19] Van Calster B, McLernon DJ, van Smeden M, Wynants L, Steyerberg EW, Bossuyt P, et al. Calibration: the Achilles heel of predictive analytics. *BMC Medicine* 2019;17:230. <https://doi.org/10.1186/s12916-019-1466-7>.
- [20] Romero Starke K, Reissig D, Petereit-Haack G, Schmauder S, Nienhaus A, Seidler A. The isolated effect of age on the risk of COVID-19 severe outcomes: a systematic review with meta-analysis. *BMJ Glob Health* 2021;6:e006434. <https://doi.org/10.1136/bmjgh-2021-006434>.
- [21] Samprathi M, Jayashree M. Biomarkers in COVID-19: An Up-To-Date Review. *Front Pediatr* 2021;8:607647. <https://doi.org/10.3389/fped.2020.607647>.

- [22] Wang D, Yin Y, Hu C, Liu X, Zhang X, Zhou S, et al. Clinical course and outcome of 107 patients infected with the novel coronavirus, SARS-CoV-2, discharged from two hospitals in Wuhan, China. *Crit Care* 2020;24:188. <https://doi.org/10.1186/s13054-020-02895-6>.
- [23] Lin J, Yan H, Chen H, He C, Lin C, He H, et al. COVID-19 and coagulation dysfunction in adults: A systematic review and meta-analysis. *J Med Virol* 2021;93:934–44. <https://doi.org/10.1002/jmv.26346>.
- [24] Grau M, Ibershoff L, Zacher J, Bros J, Tomschi F, Diebold KF, et al. Even patients with mild COVID-19 symptoms after SARS-CoV-2 infection show prolonged altered red blood cell morphology and rheological parameters. *J Cellular Molecular Medi* 2022;26:3022–30. <https://doi.org/10.1111/jcmm.17320>.
- [25] Reusch N, De Domenico E, Bonaguro L, Schulte-Schrepping J, Baßler K, Schultze JL, et al. Neutrophils in COVID-19. *Front Immunol* 2021;12:652470. <https://doi.org/10.3389/fimmu.2021.652470>.
- [26] Zuo Y, Zuo M, Yalavarthi S, Gockman K, Madison JA, Shi H, et al. Neutrophil extracellular traps and thrombosis in COVID-19. *J Thromb Thrombolysis* 2021;51:446–53. <https://doi.org/10.1007/s11239-020-02324-z>.
- [27] Zhou X, Chen D, Wang L, Zhao Y, Wei L, Chen Z, et al. Low serum calcium: a new, important indicator of COVID-19 patients from mild/moderate to severe/critical. *Bioscience Reports* 2020;40:BSR20202690. <https://doi.org/10.1042/BSR20202690>.
- [28] Boyd JC. Defining laboratory reference values and decision limits: populations, intervals, and interpretations. *Asian J Androl* 2010;12:83–90. <https://doi.org/10.1038/aja.2009.9>.
- [29] Guo C, Pleiss G, Sun Y, Weinberger KQ. On Calibration of Modern Neural Networks. *Proceedings of the 34th International Conference on Machine Learning - Volume 70* 2017;70:1321–30.
- [30] De Diego IM, Redondo AR, Fernández RR, Navarro J, Moguerza JM. General Performance Score for classification problems. *Appl Intell* 2022;52:12049–63. <https://doi.org/10.1007/s10489-021-03041-7>.
- [31] Hicks SA, Strümke I, Thambawita V, Hammou M, Riegler MA, Halvorsen P, et al. On evaluation metrics for medical applications of artificial intelligence. *Sci Rep* 2022;12:5979. <https://doi.org/10.1038/s41598-022-09954-8>.
- [32] Famiglini L, Campagner A, Carobene A, Cabitza F. A robust and parsimonious machine learning method to predict ICU admission of COVID-19 patients. *Med Biol Eng Comput* 2022. <https://doi.org/10.1007/s11517-022-02543-x>.
- [33] Campbell TW, Wilson MP, Roder H, MaWhinney S, Georgantas RW, Maguire LK, et al. Predicting prognosis in COVID-19 patients using machine learning and readily available clinical data. *International Journal of Medical Informatics* 2021;155:104594. <https://doi.org/10.1016/j.ijmedinf.2021.104594>.
- [34] Knight SR, Ho A, Pius R, Buchan I, Carson G, Drake TM, et al. Risk stratification of patients admitted to hospital with covid-19 using the ISARIC WHO Clinical Characterisation Protocol: development and validation of the 4C Mortality Score. *BMJ* 2020:m3339. <https://doi.org/10.1136/bmj.m3339>.
- [35] Smith GB, Redfern OC, Pimentel MA, Gerry S, Collins GS, Malycha J, et al. The National Early Warning Score 2 (NEWS2). *Clin Med* 2019;19:260–260. <https://doi.org/10.7861/clinmedicine.19-3-260>.
- [36] Alballa N, Al-Turaiki I. Machine learning approaches in COVID-19 diagnosis, mortality, and severity risk prediction: A review. *Informatics in Medicine Unlocked* 2021;24:100564. <https://doi.org/10.1016/j.imu.2021.100564>.
- [37] Harish K, Zhang B, Stella P, Hauck K, Moussa MM, Adler NM, et al. Validation of parsimonious prognostic models for patients infected with COVID-19. *BMJ Health Care Inform* 2021;28:e100267. <https://doi.org/10.1136/bmjhci-2020-100267>.

- [38] Boehm E, Kronig I, Neher RA, Eckerle I, Vetter P, Kaiser L. Novel SARS-CoV-2 variants: the pandemics within the pandemic. *Clinical Microbiology and Infection* 2021;27:1109–17. <https://doi.org/10.1016/j.cmi.2021.05.022>.
- [39] Schilling J, Buda S, Fischer M, Goerlitz L, Grote U, Haas W, et al. Retrospektive Phaseneinteilung der COVID-19-Pandemie in Deutschland bis Februar 2021 2021. <https://doi.org/10.25646/8149>.
- [40] Steffen, Rieck, Thorsten, Fischer, Constantin, Siedler, Anette. Inanspruchnahme der COVID-19-Impfung – Eine Sonderauswertung mit Daten bis Dezember 2021. *Epidemiologisches Bulletin* 2022;27:3–12.
- [41] Sahajpal NS, Jill Lai C-Y, Hastie A, Mondal AK, Dehkordi SR, van der Made CI, et al. Optical genome mapping identifies rare structural variations as predisposition factors associated with severe COVID-19. *IScience* 2022;25:103760. <https://doi.org/10.1016/j.isci.2022.103760>.

473 **Table 1** Characteristics of the (complete) cohort

| Characteristics                       | Number (%) or (Q1-Q3) |
|---------------------------------------|-----------------------|
| Study population                      | 532 using only 520    |
| In-hospital mortality                 | 87 (0.167=87/520)     |
| Transfer to intensive care unit (ICU) | 89 (0.171)            |
| Mechanical ventilation                | 59 (0.113)            |
| Age                                   | 60.4 (45-82)          |
| Female                                | 248 (0.477)           |

474 **Q1: first quartile, Q3: third quartile**

475 **Table 2** Additional performance metrics for the different prediction models estimated for the  
 476 test data set. The decision boundary was defined by a threshold of 50% for the estimated  
 477 class conditional probability. Abbreviations: AUC: ROC-AUC (see Figures 3 for numerical  
 478 and 4 for dichotomous features), Brier score for calibration, ECE for expected calibration  
 479 error, NPV and PPV for negative and positive predictive value, F-1 for F-1-score, ACC for  
 480 accuracy and BalAcc for balance accuracy.  
 481

| Model                        | AUC   | Brier | ECE   | NPV   | PPV   | F-1   | ACC   | Bal Acc |
|------------------------------|-------|-------|-------|-------|-------|-------|-------|---------|
| <b>Death</b>                 | 0.918 | 0.083 | 0.054 | 0.901 | 0.5   | 0.4   | 0.865 | 0.64    |
| <b>ICU</b>                   | 0.821 | 0.097 | 0.041 | 0.881 | 0.8   | 0.421 | 0.876 | 0.636   |
| <b>Ventilation</b>           | 0.654 | 0.121 | 0.088 | 0.874 | 0.333 | 0.13  | 0.855 | 0.523   |
| <b>Death (dichot.)</b>       | 0.865 | 0.14  | 0.096 | 0.78  | 0.5   | 0.222 | 0.761 | 0.549   |
| <b>ICU (dichot.)</b>         | 0.748 | 0.131 | 0.015 | 0.83  | 0.75  | 0.273 | 0.826 | 0.577   |
| <b>Ventilation (dichot.)</b> | 0.73  | 0.089 | 0.028 | 0.914 | 0.3   | 0.3   | 0.848 | 0.607   |

482

483

484 **Table 3** The same performance metrics as in Table 2 for the test data, but here the decision  
 485 boundary was defined by a maximum F-1 score, determined for the training set.

| Model                        | AUC   | Brier | ECE   | NPV   | PPV   | F-1   | ACC   | Bal Acc |
|------------------------------|-------|-------|-------|-------|-------|-------|-------|---------|
| <b>Death</b>                 | 0.918 | 0.083 | 0.054 | 0.96  | 0.6   | 0.666 | 0.898 | 0.836   |
| <b>ICU</b>                   | 0.821 | 0.097 | 0.041 | 0.954 | 0.458 | 0.579 | 0.82  | 0.806   |
| <b>Ventilation</b>           | 0.654 | 0.121 | 0.088 | 0.90  | 0.214 | 0.3   | 0.689 | 0.609   |
| <b>Death Cat (dichot.)</b>   | 0.865 | 0.14  | 0.096 | 0.894 | 0.636 | 0.651 | 0.83  | 0.774   |
| <b>ICU Cat (dichot.)</b>     | 0.748 | 0.131 | 0.015 | 0.916 | 0.394 | 0.433 | 0.728 | 0.726   |
| <b>Ventilation (dichot.)</b> | 0.73  | 0.089 | 0.028 | 0.964 | 0.222 | 0.348 | 0.674 | 0.729   |

486

487 **Figure 1.** Venn diagram indicating the overlap of the three endpoints “In-hospital mortality”, “transfer to ICU”  
488 and “mechanical ventilation” in our cohort from a hospital of medium level of care located in the federal state  
489 of Rhineland-Palatinate in the west of Germany.

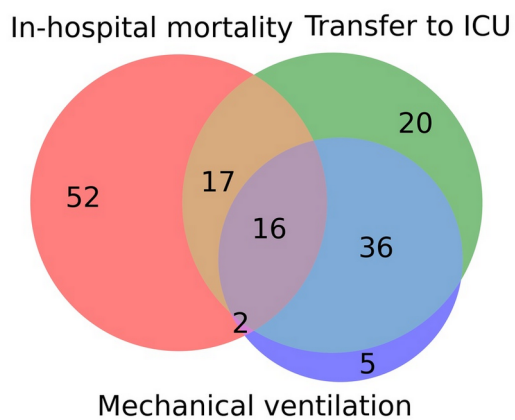



490 **Figure 2.** The association between laboratory values and the occurrence of the endpoints a) in-hospital  
 491 mortality, b) transfer to intensive care unit (ICU) and c) necessity for mechanical ventilation. The association  
 492 is given by log p-values multiplied by the sign of the association. Positive (negative) values indicate that  
 493 higher (lower) values of the laboratory values are associated with the endpoint. The p-values are obtained  
 494 from Wilcoxon rank sum tests for differences in laboratory values of the first 48 hours after admission to a  
 495 hospital between the two patient groups (Bonferroni-Holm correction for multiple testing). A list of the  
 496 abbreviations can be found in the Supplemental Material.  
 497

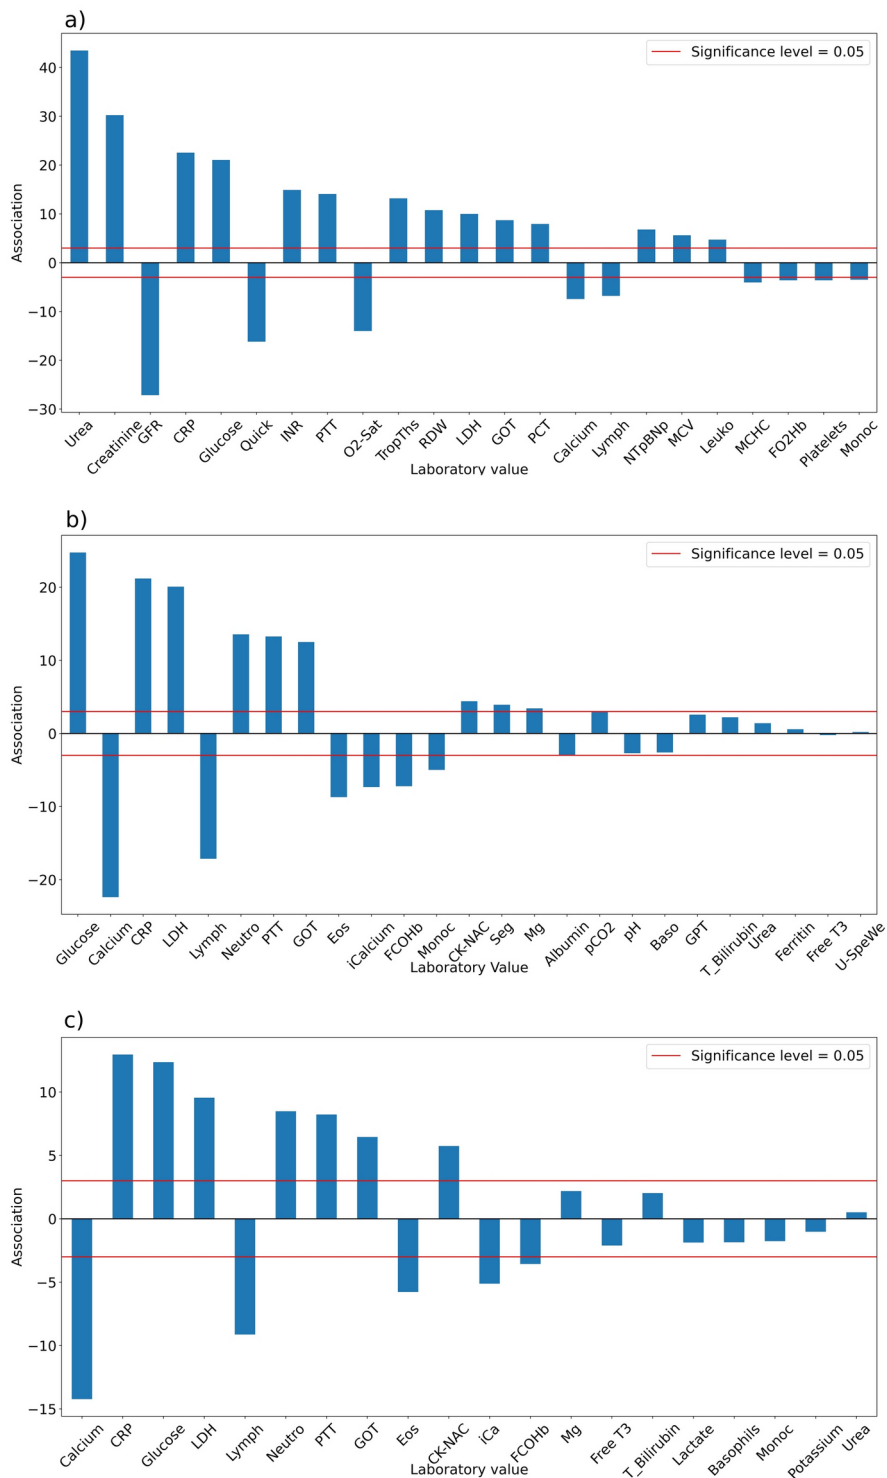

498 **Figure 3.** ROC-curves (specificity and sensitivity) of the best predictive machine-learning models for the  
499 endpoints **a)** in-hospital mortality (Logistic Regression), **b)** transfer to the ICU (XGBoost), and **c)** mechanical  
500 ventilation (Random Forest) with violinplots of their related predictors in the two patient groups. The ROC-  
501 curves are based on the test data and the violinplots on the entire dataset. A list of abbreviations can be  
502 found in the Supplemental Material.

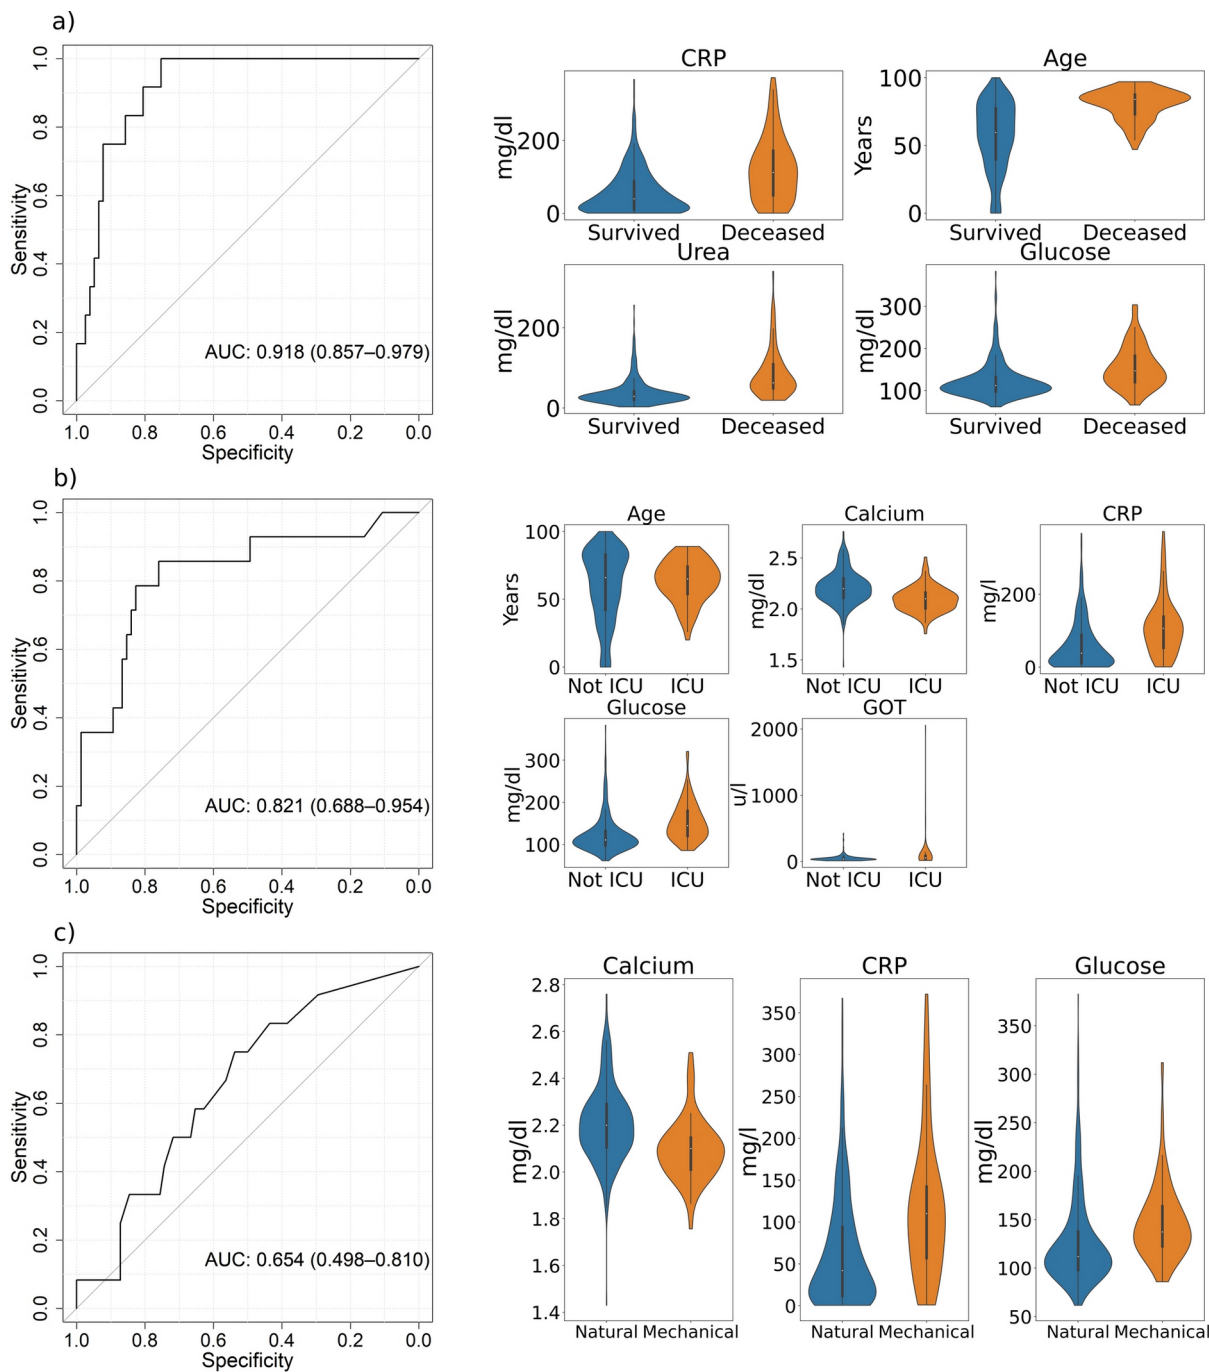

504

505 **Figure 4.** ROC-curves (specificity and sensitivity) of the best predictive machine-learning models based on  
 506 dichotomous predictors regarding the endpoints **a)** in-hospital mortality (Logistic Regression), **b)** transfer to  
 507 the ICU (Logistic Regression), and **c)** mechanical ventilation (XGBoost) with violinplots of their respective  
 508 predictors. Biological sex describes the fraction of all male/female patients with Covid-19, who were  
 509 transferred to the ICU. The ROC-curves are based on the test data and the violinplots on the entire dataset.  
 510 A list of abbreviations can be found in the Supplemental Material.

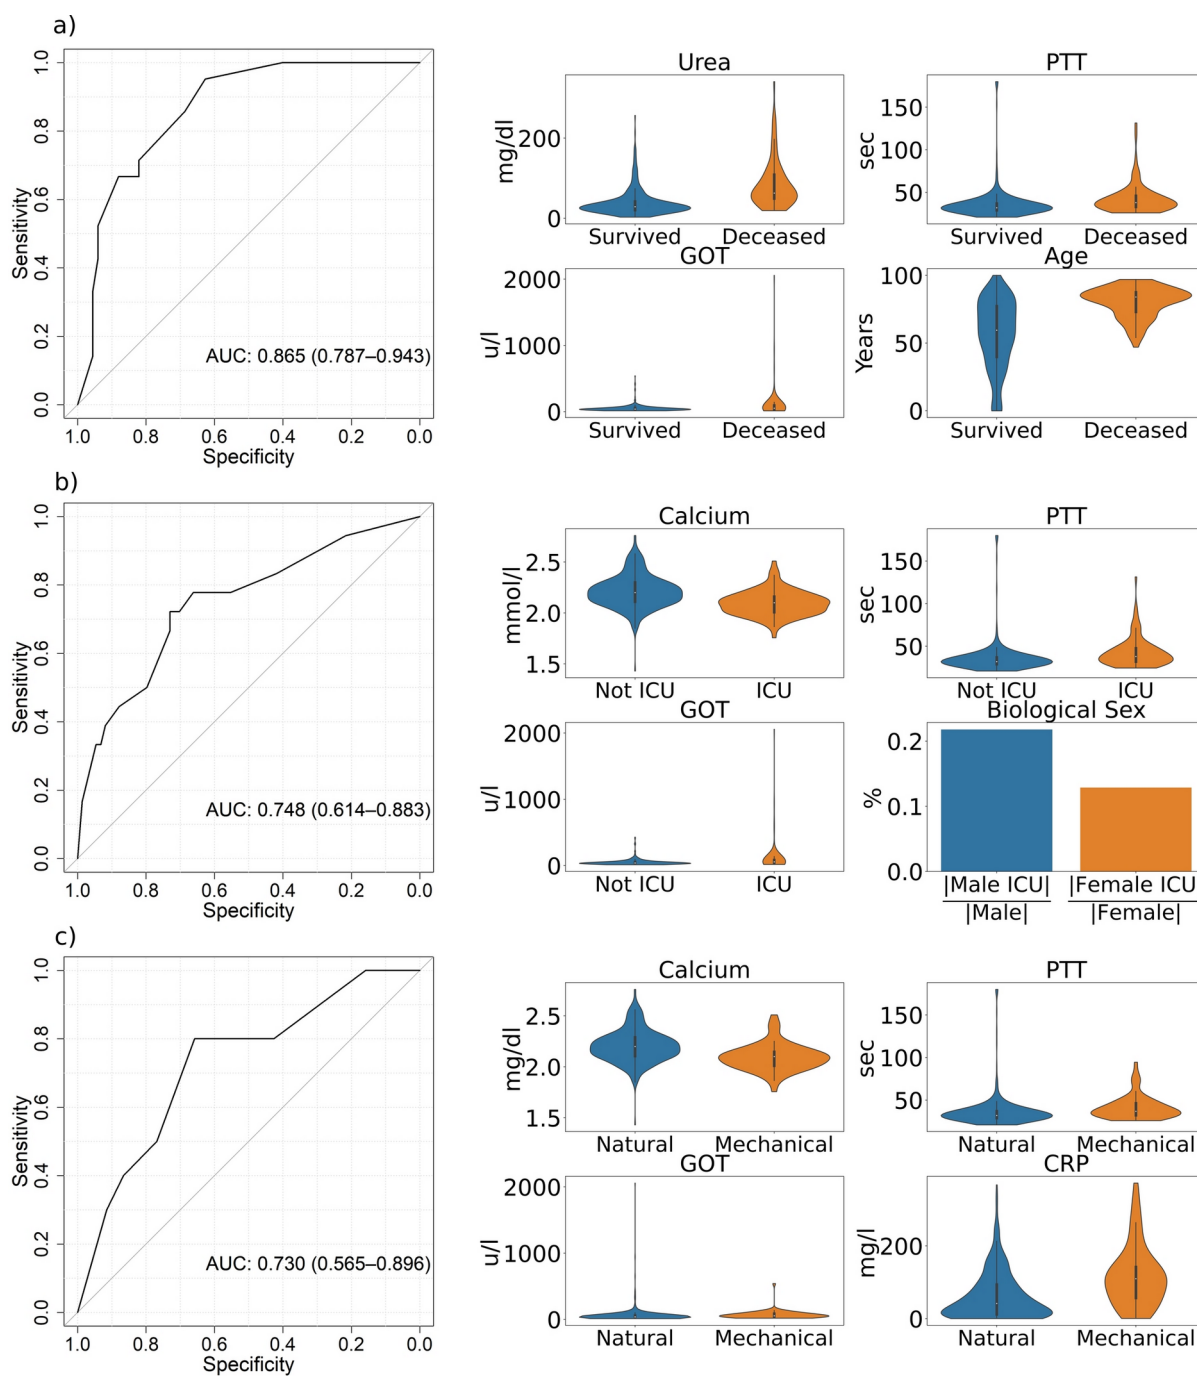

512 **Figure 5.** Calibration curves including Brier scores of the best predictive machine-learning models **a)** based  
513 on numerical predictors and **b)** based on dichotomous predictors for the endpoints in-hospital mortality,  
514 transfer to the ICU and mechanical ventilation.

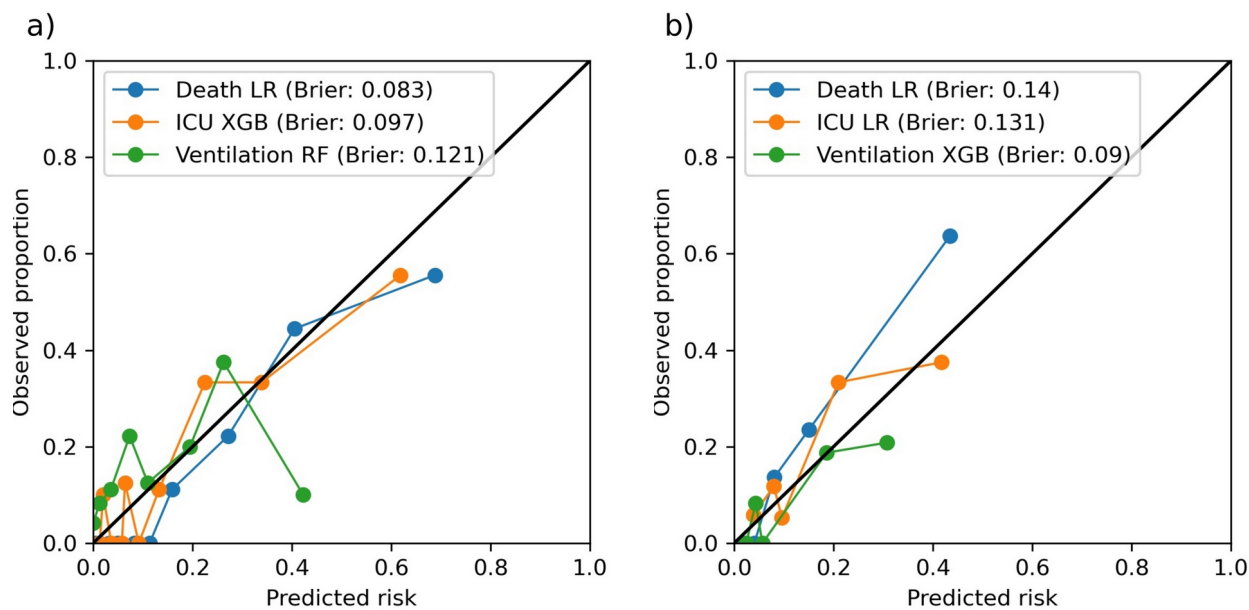

In-hospital mortality Transfer to ICU

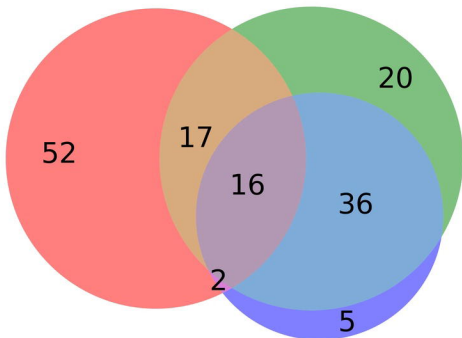

Mechanical ventilation

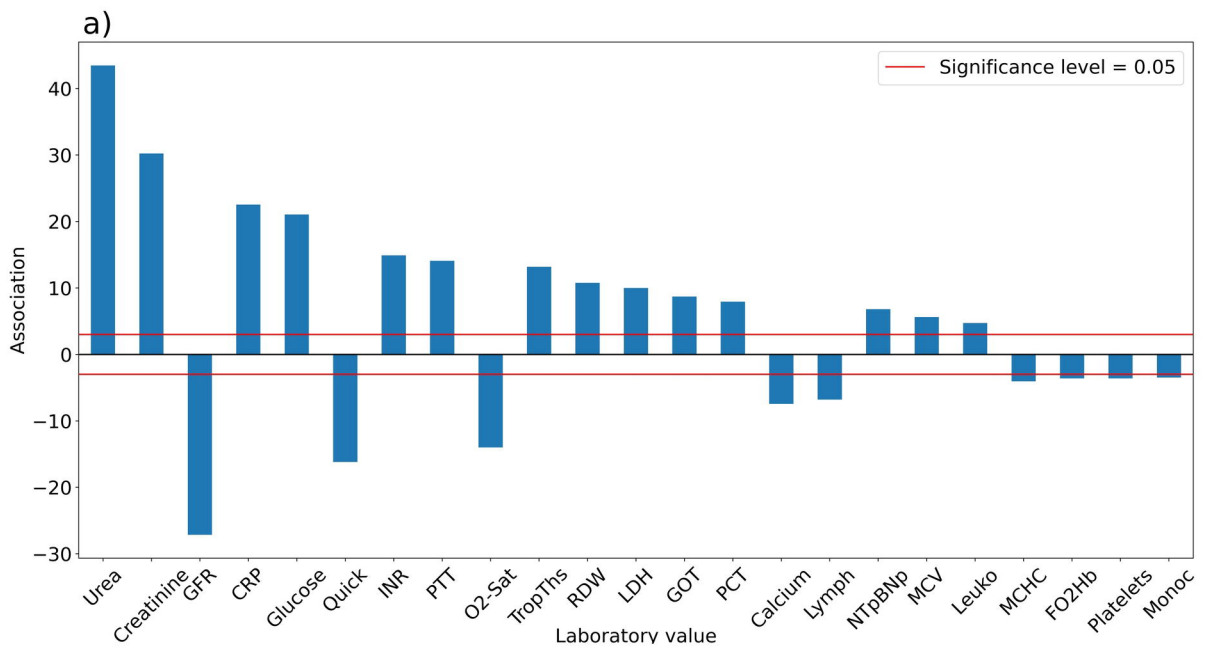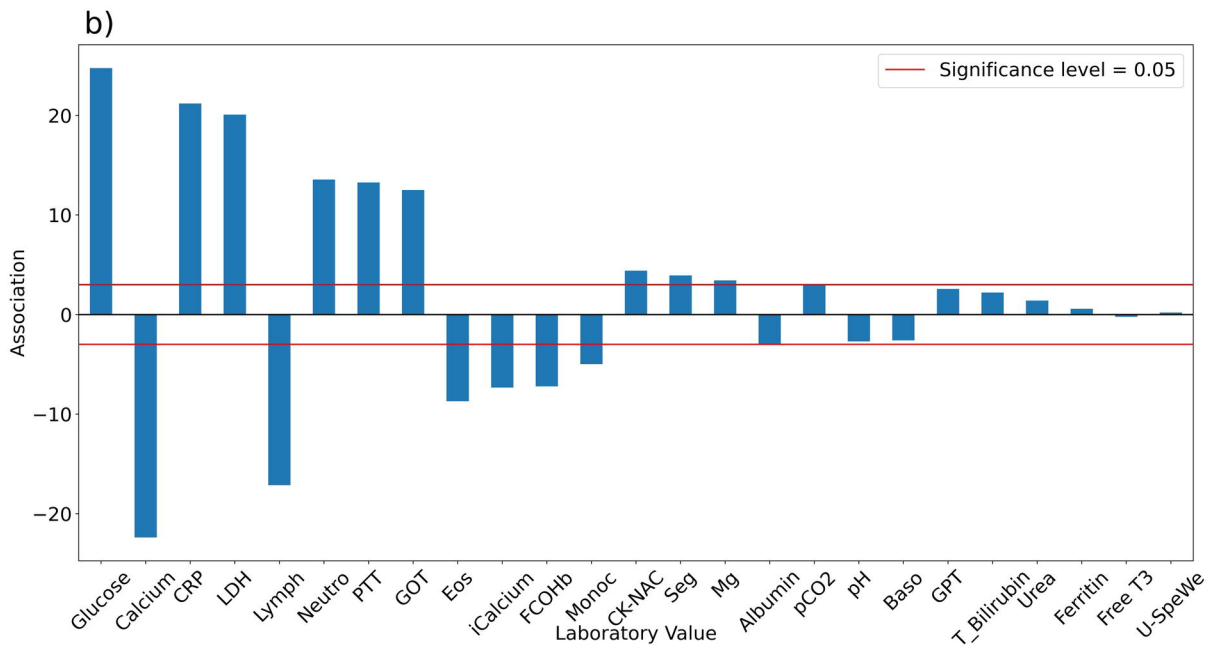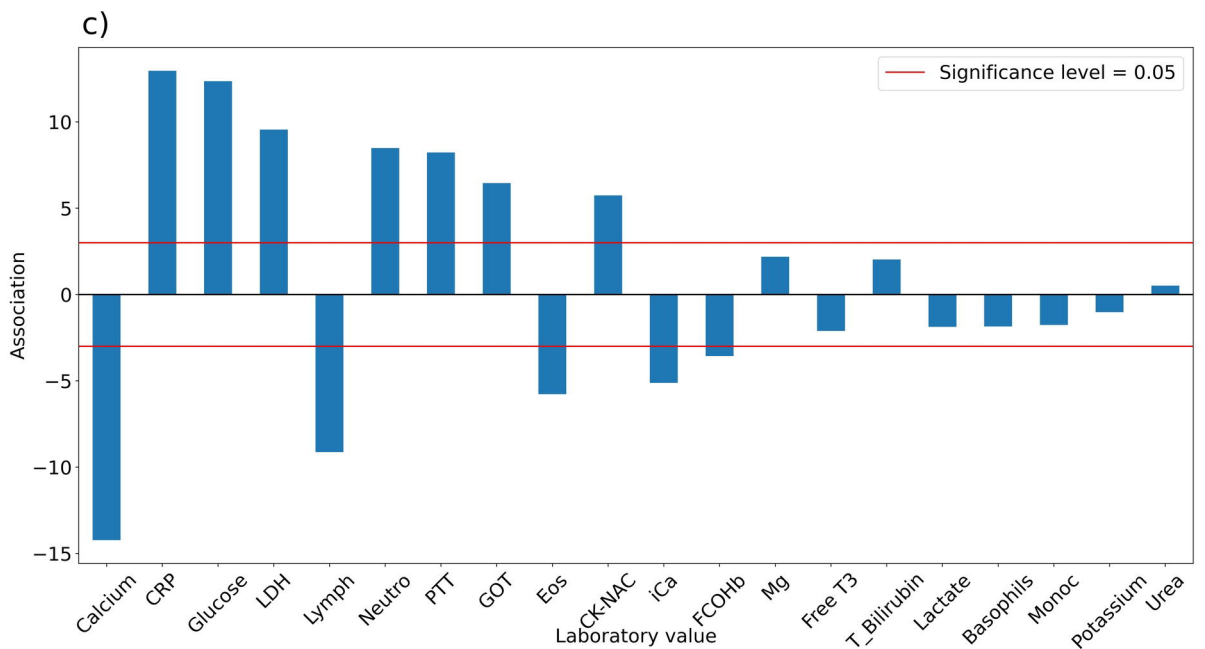

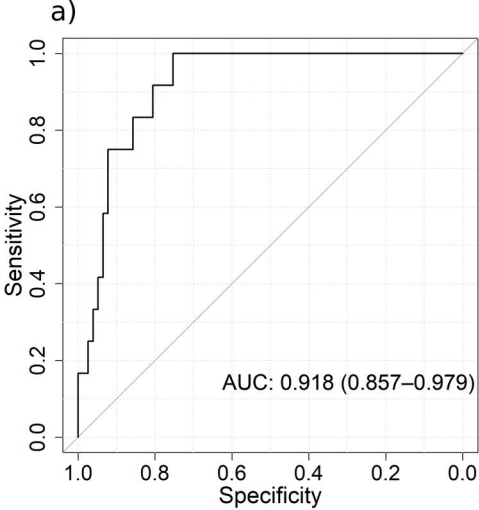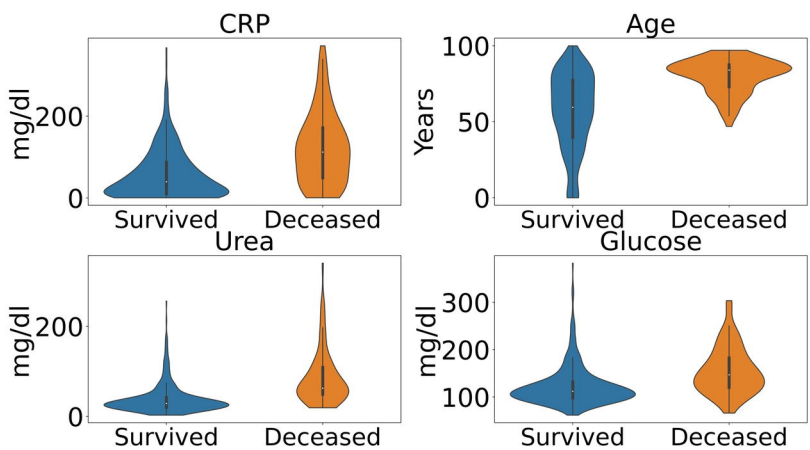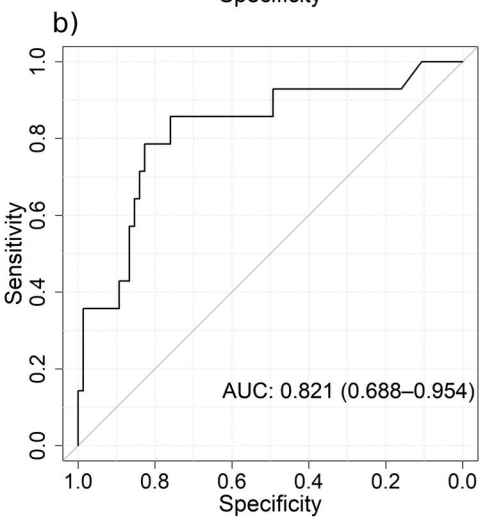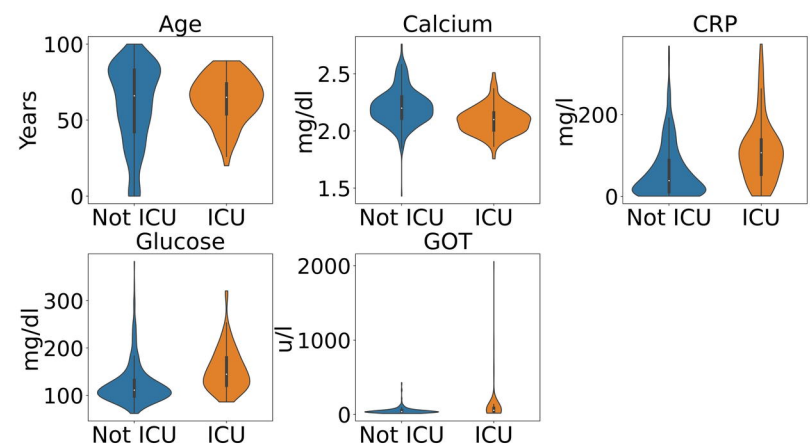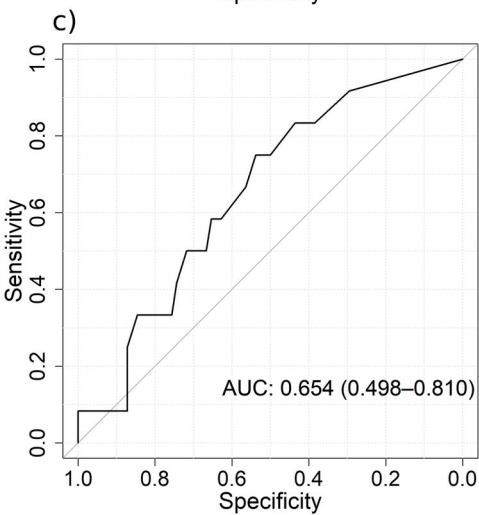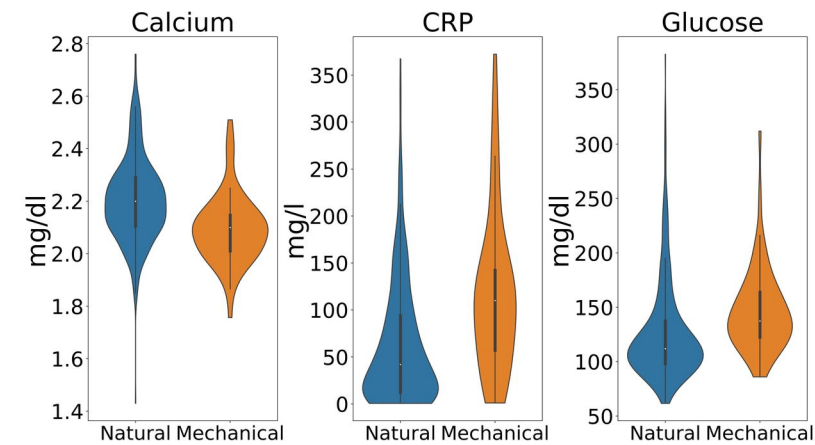

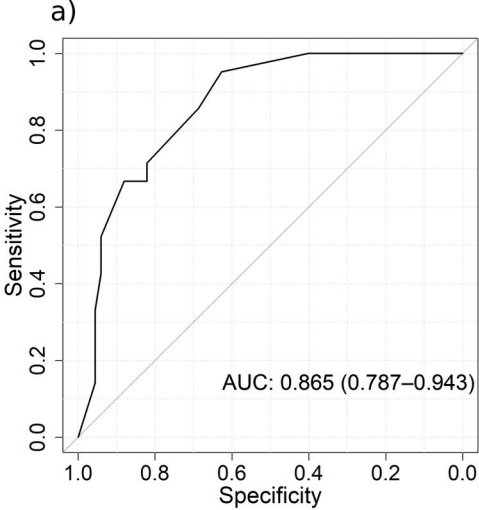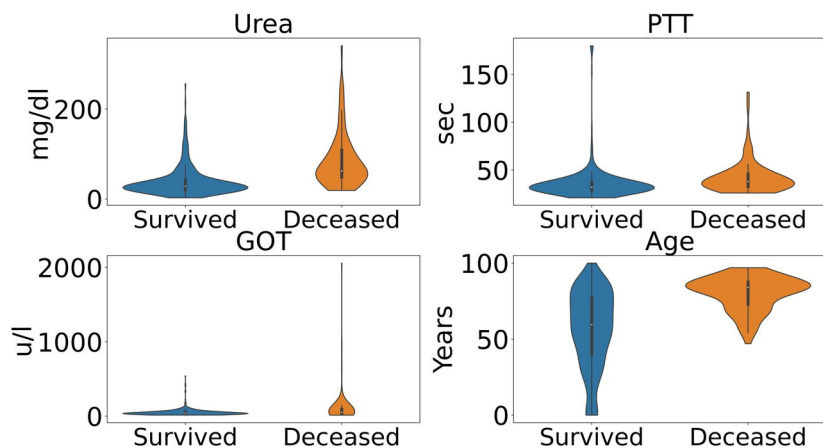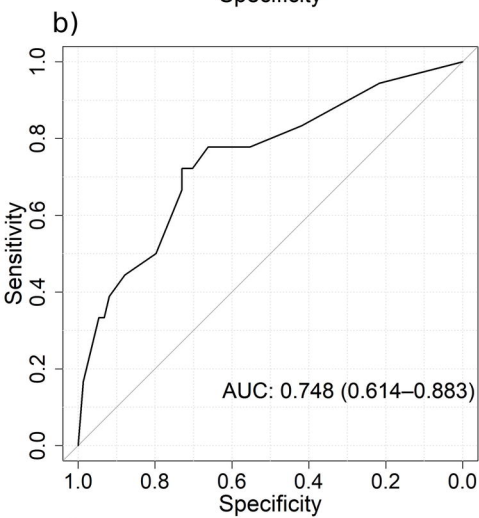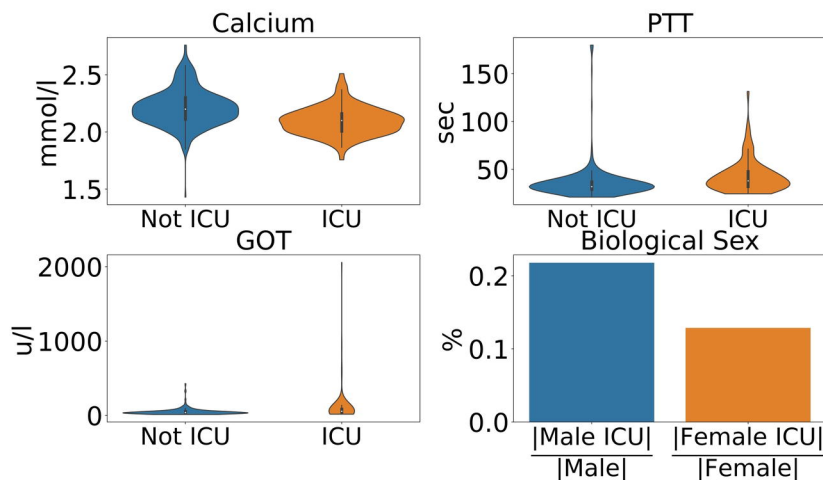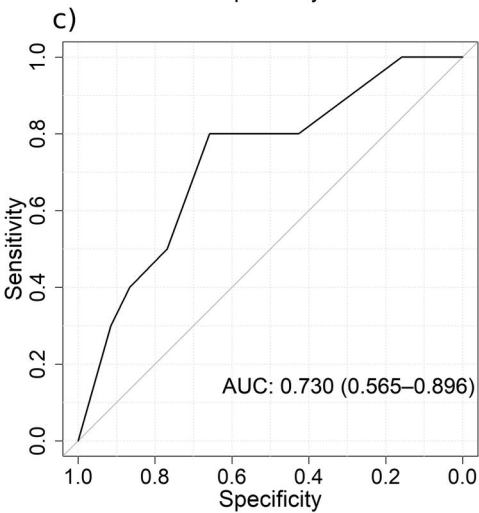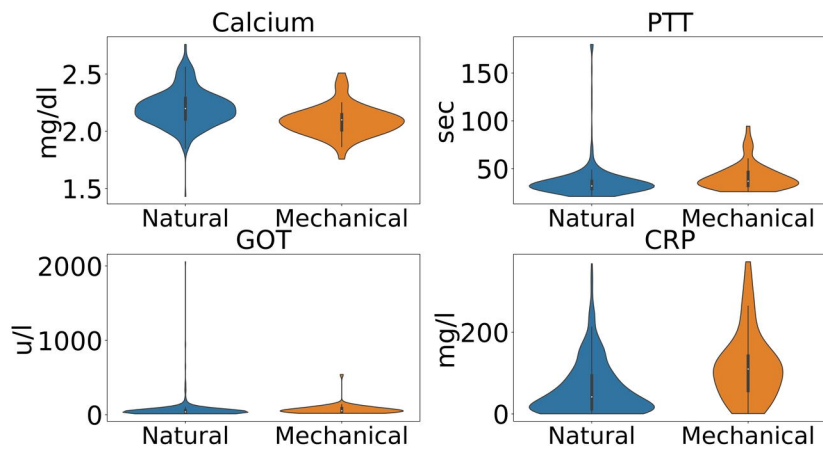



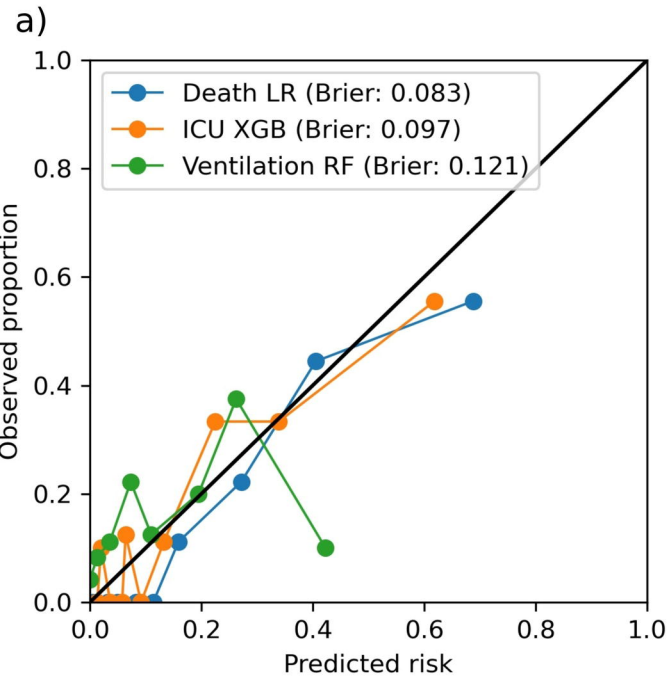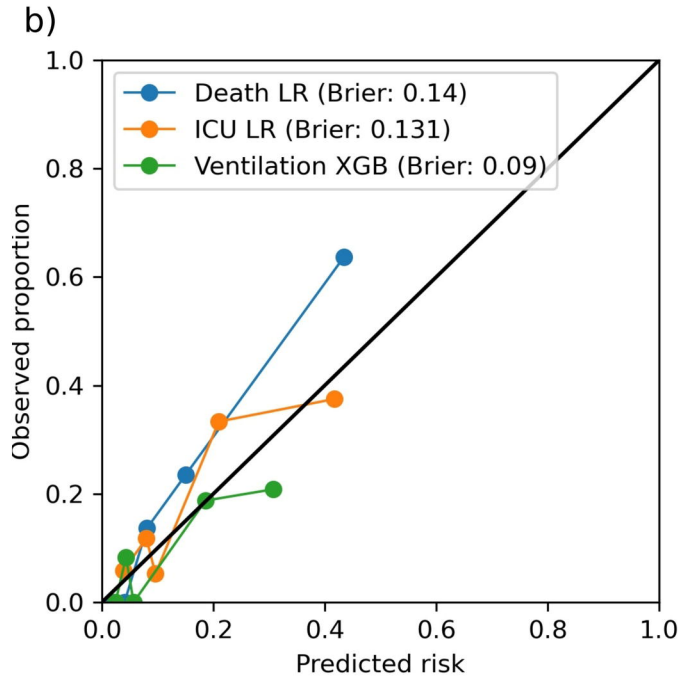

Source: http://medrxiv.org/content/10.1101/2022.10.28.22281646v2.full.pdf
